# Supplementary material
Source: Springer Nature journal article supplement (https://www.springermedizin.de/resource/supplementary/12875_2007_251_MOESM1_ESM.pdf/9436600)
Supplement: MOESM1 [file 9436600]

Recruit 20 practices and establish practice profile

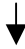

Create practice register

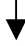

Practice randomisation

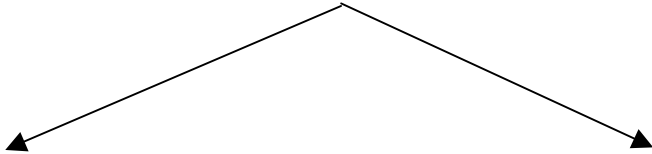

**Intervention Group**

**Control Group**

Random selection of 21 patients

Random selection of 21 patients

Consent and

Consent and

baseline data collection

baseline data collection

*(including focus groups)*

*(including focus groups)*

Standardised diabetes care

Standardised diabetes care

Peer support intervention

Follow up data collection

*(including focus group)*
